# Supplementary material for: Catalytic mechanism for the isomerization of glucose into fructose over an aluminium-MCM-41 framework
Source: Royal Society of Chemistry journal article supplement (doi:10.1039/d0cy01984d), 2020-12-16
Supplement: d0cy01984d1.pdf [file d0cy01984d1.pdf]

## **Electronic Supplementary Information:**

### **Catalytic Mechanism for the Isomerization of Glucose into Fructose over Aluminum-MCM-41 Framework**

Li-Juan Liu<sup>a</sup>, Zhao-Meng Wang<sup>a</sup>, Shuai Fu<sup>a</sup>, Zhou Huang<sup>a</sup>, Ting-Hao Liu<sup>a</sup>, Zhen-Bing Si<sup>a</sup>, Hua-Qing Yang<sup>a\*</sup>, Chang-Wei Hu<sup>b</sup>

<sup>a</sup> College of Chemical Engineering, Sichuan University, Chengdu, Sichuan, 610065, P.R. China

<sup>b</sup> Key Laboratory of Green Chemistry and Technology, Ministry of Education, College of Chemistry, Sichuan University, Chengdu, Sichuan, 610064, P.R. China

\*Correspondence to:

H.-Q. Yang; e-mail: [huaqingyang@scu.edu.cn](mailto:huaqingyang@scu.edu.cn); Fax: 86 28 85415608; Telephone: 86 28 85415608

***Catalysis Science & Technology***

## Content

|       |                                                                                                                                                                                                                                                                                                                                          |   |
|-------|------------------------------------------------------------------------------------------------------------------------------------------------------------------------------------------------------------------------------------------------------------------------------------------------------------------------------------------|---|
| i.    | The calculation equations of TOF.....                                                                                                                                                                                                                                                                                                    | 1 |
| ii.   | Description of the calculation method for the stability of the Al active sites.....                                                                                                                                                                                                                                                      | 2 |
| iii.  | <b>Figure S1:</b> The geometric structures and the schematic energy diagrams (b) with the relative energy ( $E_r$ , kJ mol <sup>-1</sup> ) relative to the reactants for the isomerization of glucose to fructose without catalyst. For clarity, hydrogen atoms on carbon are not shown. Bond lengths are reported in Å. ....            | 3 |
| iv.   | <b>Figure S2:</b> Diagram (relative energies ([Al-1]-[Al-2]) vs. temperature) showing the stability ranges for the different aluminum doped MCM-41.....                                                                                                                                                                                  | 4 |
| v.    | <b>Figure S3:</b> Diagram (relative Gibbs free energies ([Al-1]-[Al-2]) vs. temperature) showing the stability ranges for the different aluminum doped MCM-41 in aqueous solution.....                                                                                                                                                   | 5 |
| vi.   | <b>Figure S4:</b> Arrhenius plots of rate constants for the crucial reaction step of o1-IM2 → t1-TS2 + H <sub>2</sub> O in the isomerization of glucose to fructose catalyzed by [Al-1].....                                                                                                                                             | 5 |
| vii.  | <b>Figure S5:</b> Arrhenius plots of rate constants for the crucial reaction step of o2-IM2 → t2-TS2 + H <sub>2</sub> O in the isomerization of glucose to fructose catalyzed by [Al-2].....                                                                                                                                             | 6 |
| viii. | Table S1: Sum of electronic energies ( $E$ , hartree) and the relative energies ( $E_r$ , kJ mol <sup>-1</sup> ) of various species with respect to the reactants for the reaction of Glucose → Fructose catalyzed by [Al-1] at the hybrid quantum mechanics (QM, GGA-PBE/DNP) and molecular mechanics (MM, Universal) calculations..... | 7 |
| ix.   | Table S2: Sum of electronic energies ( $E$ , hartree) and the relative energies ( $E_r$ , kJ mol <sup>-1</sup> ) of various species with respect to the reactants for the reaction of Glucose → Fructose catalyzed by [Al-2] at the hybrid quantum mechanics (QM, GGA-PBE/DNP) and molecular mechanics (MM, Universal) calculations..... | 9 |

---

### The equations for calculating TOF according to the energetic span model:

The efficiency of catalyst can be determined by the turnover frequency (TOF) of the catalytic cycle. Based on the transition state theory (TST), the TOF can be calculated by Eqs. (i) and (ii) proposed by Kozuch et al., in which  $\delta E$  (the energetic span) is defined as the energy difference between the summit and trough of the catalytic cycle.<sup>1-6</sup>

$$\text{TOF} = \frac{k_B T}{h} e^{-\frac{\delta E}{RT}} \quad (\text{i})$$

$$\delta E = \begin{cases} G_{\text{TSTS}} - G_{\text{TDI}} & \text{if TSTS appears after TDI} \\ G_{\text{TSTS}} - G_{\text{TDI}} + \Delta G_r & \text{if TSTS appears before TDI} \end{cases} \quad (\text{ii})$$

where  $k_B$  is the Boltzmann constant,  $T$  is the absolute temperature, and  $h$  is the Planck constant.  $G_{\text{TSTS}}$  and  $G_{\text{TDI}}$  are the Gibbs free energies of the TOF determining transition state (TSTS) and the TOF determining intermediate (TDI), and  $\Delta G_r$  is the global free energy of the whole cycle.

### References:

1. C. Amatore and A. Jutand, *J. Organomet. Chem.*, 1999, **576**, 254-278.
2. S. Kozuch and S. Shaik, *J. Am. Chem. Soc.*, 2006, **128**, 3355-3365.
3. S. Kozuch and S. Shaik, *J. Phys. Chem. A*, 2008, **112**, 6032-6041.
4. S. Kozuch and S. Shaik, *Acc. Chem. Res.*, 2011, **44**, 101-110.
5. A. Uhe, S. Kozuch and S. Shaik, *J. Comput. Chem.*, 2011, **32**, 978-985.
6. S. Kozuch, *ACS Catal.*, 2015, **5**, 5242-5255.

---

## Description of the calculation method for the stability of the Al active sites:

To estimate the relative stability between the chemisorbed species, Tielens' group performed calculations using the atomistic thermodynamics approach.<sup>7-10</sup> To take into account deviations in surface composition and the presence of gas phases, the approximation of the Gibbs free-surface energy was also calculated by introducing an appropriate chemical potential, which corrected the deviations in surface composition and the presence of gas phases.

Based on the atomistic thermodynamics approach, we calculated the stability of the Al active sites on Al-MCM-41. According to the reaction given (equation 1), the Gibbs free energy of [Al-1] and [Al-2] as follows:

$$\Delta G_{[Al-1]} = E_{[(SiO)_8(SiOH)(Si)_2(OH)_2Al(OH)_1]} + E_{SiO_2} - E_{[(SiO)_9(Si)_3(OH)_3]} - E_{HAlO_2} \quad (a)$$

$$\Delta G_{[Al-2]} = E_{[(SiO)_8(SiOH)(Si)_2(OH)Al(OH)_2]} + E_{SiO_2} - E_{[(SiO)_9(Si)_3(OH)_3]} - E_{HAlO_2} \quad (b)$$

The formula for calculating the variation of energy (kJ mol<sup>-1</sup>) with temperature in equation (a) and (b) is as follows:

$$E_y = (E + G_0 / 627.51) \times 2625.5 \quad (c)$$

where  $y$  represents each species in equation 1,  $E$  is the total energy (Ha) of each species after the optimized structure, and  $G_0$  is the corrected value of free energy at different temperatures after calculating frequency (kcal mol<sup>-1</sup>, including zero vibration energy).

## References:

1. M. M. Islam, D. Costa, M. Calatayud and F. Tielens, *J. Phys. Chem. C.*, 2009, **24**, 10740–10746.
2. H. Guesmi and F. Tielens, *J. Phys. Chem. C.*, 2012, **116**, 994–1001.
3. A. Wojtaszek, I. Sobczak, M. Ziolek and F. Tielens, *J. Phys. Chem. C.*, 2010, **114**, 9002–9007.
4. H. Guesmi, R. Grybos, J. Handzlik and F. Tielens, *Phys.Chem.Chem.Phys.*, 2014, **16**, 18253--18260.

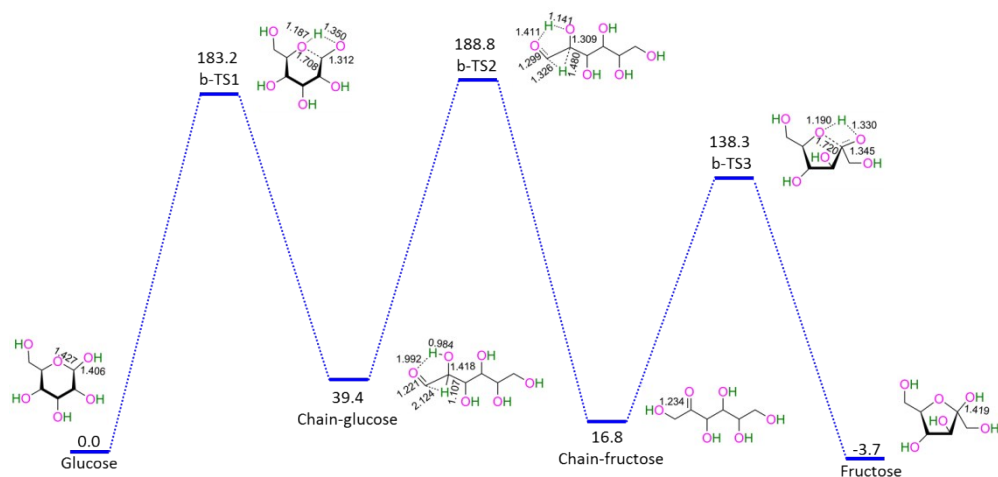

**Figure S1:** The geometric structures and the schematic energy diagrams (b) with the relative energy ( $E_r$ ,  $\text{kJ mol}^{-1}$ ) relative to the reactants for the isomerization of glucose to fructose without catalyst. For clarity, hydrogen atoms on carbon are not shown. Bond lengths are reported in Å.

**Notes:** The geometric structures and the schematic energy diagrams for the isomerization of glucose to fructose without catalyst are shown Fig. S1.

As shown in Fig. S1, at the beginning, from glucose to chain-glucose, a [1,3]-H shift takes place via a four-membered cyclic b-TS1, resulting in the ring-opening, with the energy height of the highest point (EHHP) of  $183.2 \text{ kJ mol}^{-1}$  at b-TS1 and the highest energy barrier (HEB) of  $183.2 \text{ kJ mol}^{-1}$  at the reaction step of  $\text{Glucose} \rightarrow \text{b-TS1}$ . Then the aldose–ketose tautomerization takes place through the intramolecular H-shift via a chair six-membered b-TS2, with the EHHP of  $188.8 \text{ kJ mol}^{-1}$  at b-TS2 and the HEB of  $149.4 \text{ kJ mol}^{-1}$  at the reaction step of  $\text{Chain-glucose} \rightarrow \text{b-TS2}$ . Finally, from chain-fructose to fructose, a [1,3]-H shift takes place via a four-membered b-TS3, accomplishing the ring-closure, with the EHHP of  $138.3 \text{ kJ mol}^{-1}$  at b-TS3 and the HEB of  $121.5 \text{ kJ mol}^{-1}$  at the reaction step of  $\text{Chain-fructose} \rightarrow \text{b-TS3}$ .

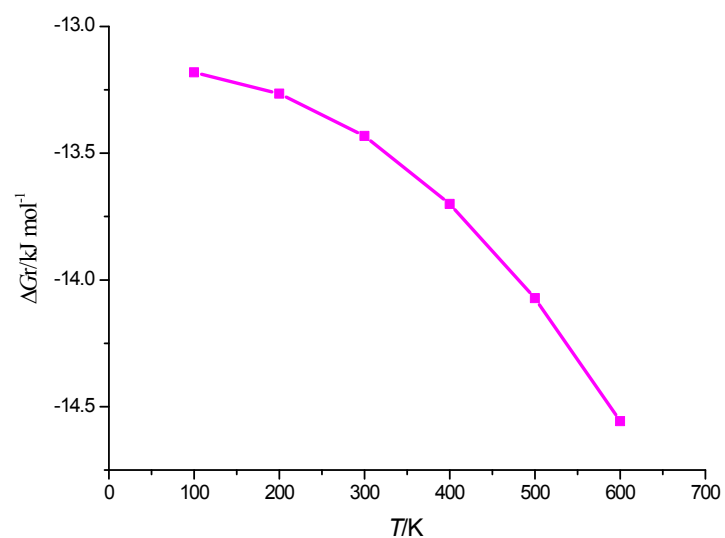

**Figure S2:** Diagram (relative Gibbs free energies ([Al-1]-[Al-2]) vs. temperature) showing the stability ranges for the different aluminum doped MCM-41 in the gas phase.

**Notes:** As shown in **Figure S2**, in the gas phase, [Al-1] active site is more stable than [Al-2] active site, over the temperature range of 100 ~ 600 K.

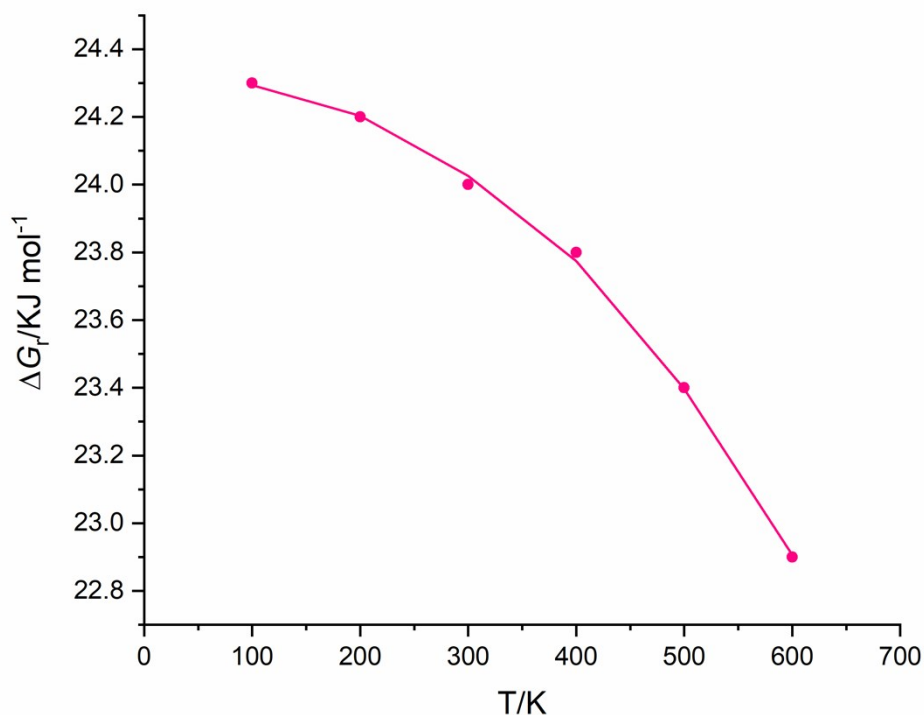

**Figure S3:** Diagram (relative Gibbs free energies ([Al-1]-[Al-2]) vs. temperature) showing the stability ranges for the different aluminum doped MCM-41 in aqueous solution.

**Notes:** For the the stabilities of Al-containing active sites on Al-MCM-41 in aqueous solution, the single-point energy calculation was employed, based on the optimized geometric structures in the gas phase. The single-point energy calculation was implemented in DMol<sup>3</sup> program.<sup>1</sup> Conductor-like screening model (COSMO) with a dielectric constant of 78.54 was adopted to consider the water solvent effect.<sup>2</sup> All electron relativistic method with a double numerical basis set together with polarization functions (DNP) was adopted to form the Perdew-Burke-Ernzerhof (PBE) exchange-correlation functional within the generalized gradient approximation (GGA).<sup>3,4</sup> A Fermi smearing of 0.005 hartree for orbital occupancy was used to improve the computational performance.

**References:**

1. B. Delley, J. Chem. Phys., 2000, 113, 7756-7764.
2. B. Delley, Mol. Simul., 2006, 32, 117-123.
3. B. Delley, J. Chem. Phys., 1990, 92, 508-517.
4. J. P. Perdew, K. Burke and M. Ernzerhof, Phys. Rev. Lett., 1996, 77, 3865–3868.

As shown in **Figure S2**, in aqueous solution, [Al-2] active site is more stable than [Al-1] active site, over the temperature range of 100 ~ 600 K.

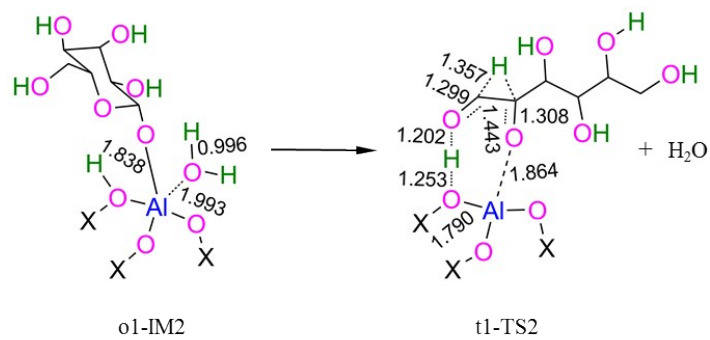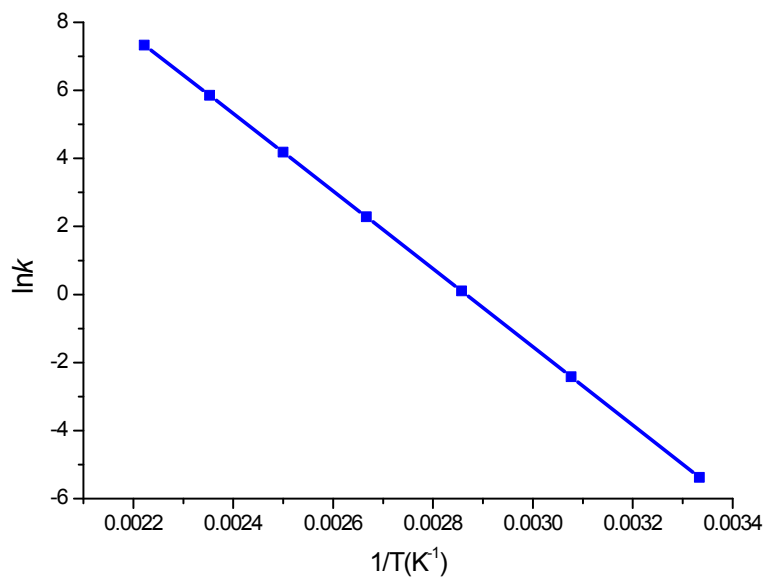

$$k_{w-1} = 1.70 \times 10^{14} \exp(-95,096 / RT)$$

**Figure S4:** Arrhenius plots of rate constants for the crucial reaction step of o1-IM2 → t1-TS2 + H<sub>2</sub>O in the isomerization of glucose to fructose catalyzed by [Al-1].



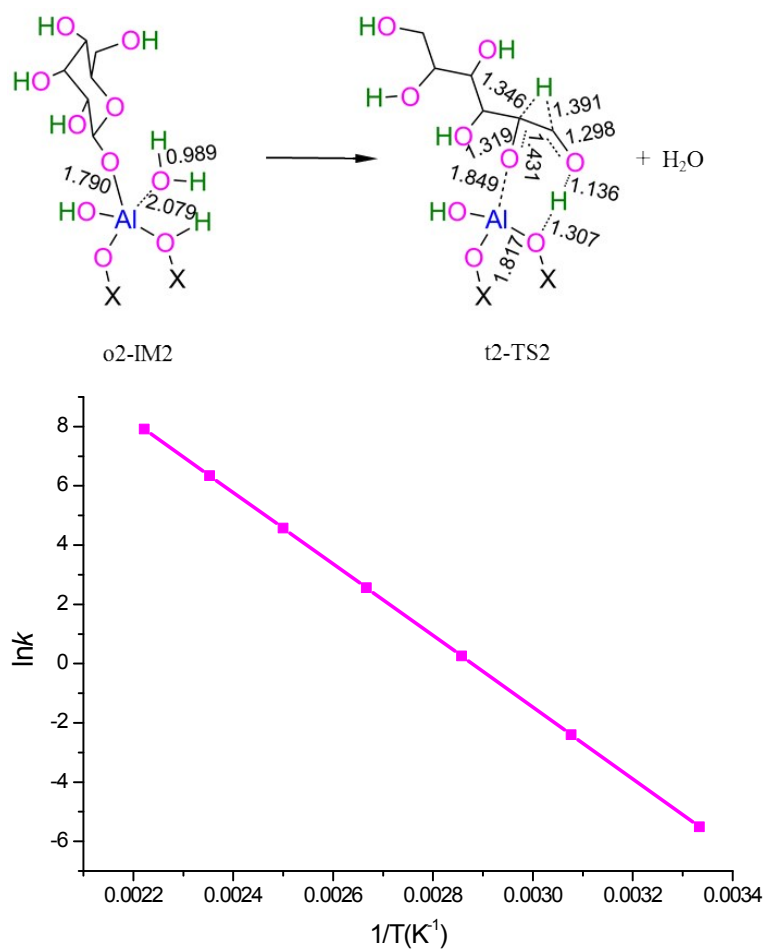

**Figure S5:** Arrhenius plots of rate constants for the crucial reaction step of o2-IM2 → t2-TS2 + H<sub>2</sub>O in the isomerization of glucose to fructose catalyzed by [Al-2].

**Table S1:** Sum of electronic energies ( $E$ , hartree) and the relative energies ( $E_r$ , kJ mol<sup>-1</sup>) of various species with respect to the reactants for the reaction of Glucose  $\rightarrow$  Fructose catalyzed by [Al-1] at the hybrid quantum mechanics (QM, GGA-PBE/DNP) and molecular mechanics (MM, Universal) calculations.

| Species                   | $E$         | $E_r$ |
|---------------------------|-------------|-------|
| Glucose                   | -686.69845  |       |
| Chain-glucose             | -686.68343  |       |
| Chain-fructose            | -686.69206  |       |
| Fructose                  | -686.69987  |       |
| H <sub>2</sub> O          | -76.37872   |       |
| [Al-1]                    | -2535.06733 |       |
| [Al-1] + Glucose          | -3221.76578 | 0.0   |
| o1-IM1                    | -3221.77655 | -28.3 |
| o1-TS1                    | -3221.76923 | -9.1  |
| o1-IM2                    | -3221.79468 | -75.9 |
| o1-IM3                    | -3145.40030 |       |
| o1-IM3 + H <sub>2</sub> O | -3221.77902 | -34.8 |
| o1-TS2                    | -3145.38886 |       |
| o1-TS2 + H <sub>2</sub> O | -3221.76758 | -4.7  |
| o1-IM4                    | -3145.39376 |       |
| o1-IM4 + H <sub>2</sub> O | -3221.77247 | -17.6 |
| 1-IM5                     | -2535.08739 |       |
| 1-IM5 + Chain-glucose     | -3221.77082 | -13.2 |
| 1-TS3                     | -2535.05916 |       |
| 1-TS3 + Chain-glucose     | -3221.74259 | 60.9  |
| [Al-1] + Chain-glucose    | -3221.75076 | 39.4  |
| t1-IM1                    | -3221.76522 | 1.5   |
| t1-TS1                    | -3221.75528 | 27.6  |
| t1-IM2                    | -3221.77697 | -29.4 |
| t1-IM3                    | -3145.39444 |       |
| t1-IM3 + H <sub>2</sub> O | -3221.77316 | -19.4 |
| t1-TS2                    | -3145.35942 |       |
| t1-TS2 + H <sub>2</sub> O | -3221.73813 | 72.6  |
| t1-IM4                    | -3145.39034 |       |
| t1-IM4 + H <sub>2</sub> O | -3221.76906 | -8.6  |
| 1-IM5 + Chain-fructose    | -3221.77945 | -35.9 |
| 1-TS3 + Chain-fructose    | -3221.75122 | 38.2  |
| [Al-1] + Chain-fructose   | -3221.75939 | 16.8  |
| c1-IM1                    | -3221.77475 | -23.6 |
| c1-TS1                    | -3221.77108 | -13.9 |
| c1-IM2                    | -3221.78326 | -45.9 |
| c1-IM3                    | -3145.38946 |       |
| c1-IM3 + H <sub>2</sub> O | -3221.76817 | -6.3  |
| c1-TS2                    | -3145.38658 |       |
| c1-TS2 + H <sub>2</sub> O | -3221.76530 | 1.3   |

---

| <i>Continued Table S1</i> |             |       |
|---------------------------|-------------|-------|
| Species                   | $E$         | $E_r$ |
| c1-IM4                    | -3145.40320 |       |
| c1-IM4 + H <sub>2</sub> O | -3221.78192 | -42.4 |
| c1-IM5 + Fructose         | -3221.78726 | -56.4 |
| c1-TS3 + Fructose         | -3221.75903 | 17.7  |
| [Al-1] + Fructose         | -3221.76720 | -3.7  |

---

**Table S2:** Sum of electronic energies ( $E$ , hartree) and the relative energies ( $E_r$ , kJ mol<sup>-1</sup>) of various species with respect to the reactants for the reaction of Glucose  $\rightarrow$  Fructose catalyzed by [Al-2] at the hybrid quantum mechanics (QM, GGA-PBE/DNP) and molecular mechanics (MM, Universal) calculations.

| Species                   | $E$         | $E_r$ |
|---------------------------|-------------|-------|
| Glucose                   | -686.69845  |       |
| Chain-glucose             | -686.68343  |       |
| Chain-fructose            | -686.69206  |       |
| Fructose                  | -686.69987  |       |
| H <sub>2</sub> O          | -76.37872   |       |
| [Al-2]                    | -3322.40542 |       |
| [Al-2] + Glucose          | -4009.10387 | 0.0   |
| o2-IM1                    | -4009.11472 | -28.5 |
| o2-TS1                    | -4009.10906 | -13.6 |
| o2-IM2                    | -4009.13355 | -77.9 |
| o2-IM3                    | -3932.74321 |       |
| o2-IM3 + H <sub>2</sub> O | -4009.12193 | -47.4 |
| o2-TS2                    | -3932.73999 |       |
| o2-TS2 + H <sub>2</sub> O | -4009.11871 | -38.9 |
| o2-IM4                    | -3932.74271 |       |
| o2-IM4 + H <sub>2</sub> O | -4009.12143 | -46.1 |
| 2-IM5                     | -3322.41978 |       |
| 2-IM5 + Chain-glucose     | -4009.10321 | 1.7   |
| 2-TS3                     | -3322.40070 |       |
| 2-TS3+ Chain-glucose      | -4009.08413 | 51.8  |
| [Al-2] + Chain-glucose    | -4009.08886 | 39.4  |
| t2-IM1                    | -4009.11793 | -36.9 |
| t2-TS1                    | -4009.10258 | 3.4   |
| t2-IM2                    | -4009.10606 | -5.7  |
| t2-IM3                    | -3932.73241 |       |
| t2-IM3 + H <sub>2</sub> O | -4009.11113 | -19.0 |
| t2-TS2                    | -3932.70149 |       |
| t2-TS2 + H <sub>2</sub> O | -4009.08020 | 62.2  |
| t2-IM4                    | -3932.73484 |       |
| t2-IM4 + H <sub>2</sub> O | -4009.11355 | -25.4 |
| 2-IM5 + Chain-fructose    | -4009.11183 | -20.9 |
| 2-TS3 + Chain-fructose    | -4009.09276 | 29.2  |
| [Al-2] + Chain-fructose   | -4009.09748 | 16.8  |
| c2-IM1                    | -4009.12255 | -49.0 |
| c2-TS1                    | -4009.10307 | 2.1   |
| c2-IM2                    | -4009.11537 | -30.2 |
| c2-IM3                    | -3932.73477 |       |
| c2-IM3 + H <sub>2</sub> O | -4009.11349 | -25.2 |
| c2-TS2                    | -3932.73139 |       |
| c2-TS2 + H <sub>2</sub> O | -4009.11010 | -16.3 |

---

| <i>Continued</i> Table S2 |             |       |
|---------------------------|-------------|-------|
| pecies                    | $E$         | $E_r$ |
| c2-IM4                    | -3932.74151 |       |
| c2-IM4 + H <sub>2</sub> O | -4009.12022 | -42.9 |
| 2-IM5 + Fructose          | -4009.11965 | -41.4 |
| 2-TS3 + Fructose          | -4009.10057 | 8.7   |
| [A1-2] + Fructose         | -4009.10530 | -3.7  |

---
